# Supplementary material for: ING5 suppresses proliferation, apoptosis, migration and invasion, and induces autophagy and differentiation of gastric cancer cells: a good marker for carcinogenesis and subsequent progression
Source: PubMed Central journal article supplement (PMC4637305; doi:10.18632/oncotarget.3735), 2015-03-30
Supplement: oncotarget-06-19552-s001.pdf [file oncotarget-06-19552-s001.pdf]

**ING5 suppresses proliferation, apoptosis, migration and invasion, and induces autophagy and differentiation of gastric cancer cells: a good marker for carcinogenesis and subsequent progression**

**Supplementary Material**

**Supplementary Table 1** The primers used in RT-PCR

|    | Names           | Primer' s sequence                                                 | Distribution              | AT(°C) | Product size(bp) | Extensio n time(s) |
|----|-----------------|--------------------------------------------------------------------|---------------------------|--------|------------------|--------------------|
| 1  | <i>ING5</i>     | F: 5'-GGGAGATGATTGGCTGTG-3'<br>R: 5'-CCTTTGGGTTTCGTGGTA-3'         | NM_032329.4<br>614-759    | 60     | 146              | 34                 |
| 2  | <i>CyclinE1</i> | F: 5'-GGATGTTGACTGCCTTGA-3'<br>R: 5'-CGCACCACCTGATACCCT-3'         | BA000005<br>1044-1150     | 60     | 107              | 34                 |
| 3  | <i>cdc2</i>     | F: 5'-GGGCACTCCCAATAA-3'<br>R: 5'-GATGCTAGGCTTCCTG-3'              | XM_572099<br>631-723      | 60     | 93               | 34                 |
| 4  | <i>Bcl-2</i>    | F: 5'-GCCTTCTTTGAGTTCGGTGGG-3'<br>R: 5'-TGTGCAGGTGCCGTTTCAG-3'     | DQ926871<br>938-1052      | 60     | 115              | 34                 |
| 5  | <i>Bax</i>      | F: 5'-GATTGCCCGCTGGAC-3'<br>R: 5'-GCCCCAGTTGAAGTTGC-3'             | DQ926869<br>306-393       | 60     | 88               | 34                 |
| 6  | <i>14-3-3</i>   | F: 5'-CAAAGACAGCACCTCA-3'<br>R: 5'-TTCTGCCGCATCACAT-3'             | XM_010379682.1<br>845-935 | 60     | 91               | 34                 |
| 7  | <i>Raptor</i>   | F: 5'-GACATTCTGTGGCACTC-3'<br>R: 5'-GTCGTCCAATCTCGTAATGC-3'        | BC136654<br>3690-3850     | 60     | 161              | 34                 |
| 8  | <i>mToR</i>     | F: 5'-CGCTGTCATCCCTTTATC-3'<br>R: 5'-TTCTTCTCCCTGTAGTCCC-3'        | NM_004958<br>2092-2187    | 60     | 96               | 34                 |
| 9  | <i>Akt2</i>     | F: 5'-CGGCTCCTTCATTGGG-3'<br>R: 5'-GCTGGCATTCTGCTACGG-3'           | HUMAKT2A<br>404-492       | 60     | 89               | 34                 |
| 10 | <i>Akt3</i>     | F: 5'-GACATTCTGTGGCACTC-3'<br>R: 5'-TCTCATGGTCTCGTT-3'             | NM_005465<br>1065-1210    | 60     | 146              | 34                 |
| 11 | <i>IL-1</i>     | F: 5'-GACGCCCTCAATCAAAGT-3'<br>R: 5'-CTTGGGCAGTCACATACA-3'         | KJ891448.1<br>477-654     | 60     | 178              | 34                 |
| 12 | <i>IL-2</i>     | F: 5'-GACTTTACTGCTGGATTT-3'<br>R: 5'-ATTGCTGATTAAGTCCCT-3'         | NM_000586.3<br>160-379    | 60     | 220              | 34                 |
| 13 | <i>IL-4</i>     | F: 5'-CAGTTCTACAGCCACCAT-3'<br>R: 5'-CTGGTTGGCTTCCCTTAC-3'         | NM_172348.2<br>249-407    | 60     | 159              | 34                 |
| 14 | <i>IL-10</i>    | F: 5'-TCAGGGTGGCGACTCTAT-3'<br>R: 5'-TGGGCTTCTTTCTAAATCGTT-3'      | NM_000572.2<br>601-799    | 60     | 199              | 34                 |
| 15 | <i>IL-17</i>    | F: 5'-GAAGGCAGGAATCACAAT-3'<br>R: 5'-ATCGGTTGTAGTAATCTG-3'         | NM_002190.2<br>108-253    | 60     | 146              | 34                 |
| 16 | <i>CyclinD1</i> | F: 5'-TGCCACAGATGTGAAGTTCATT-3'<br>R: 5'-CAGTCCGGGTCACACTTGAT-3'   | NG_000002<br>776-937      | 60     | 162              | 34                 |
| 17 | <i>Survivin</i> | F: 5'-TTCTCAAGGACCACCGCATC-3'<br>R: 5'-AGCCTTCCAGCTCCTTGAAG-3'     | DQ508252<br>159-320       | 60     | 162              | 34                 |
| 18 | <i>C-myc</i>    | F: 5'-AGCGACTCTGAGGAGGAACA-3'<br>R: 5'-TCCAGCAGAAGGTGATCCA-3'      | X00676<br>1318-1425       | 60     | 108              | 34                 |
| 19 | <i>VEGF</i>     | F: 5'-GCGCTCGGTGCTGGAATTTG-3'<br>R: 5'-TAGAGCAATCTCCCCAAGCCGTCG-3' | NM_001204384.1<br>118-276 | 60     | 159              | 34                 |
| 20 | <i>IRE1</i>     | F: 5'-ACTGGCTTCTGATAGGAC-3'<br>R: 5'-GATGTTTGGGTAGATTGTT-3'        | XM_511585.5<br>2251-2337  | 60     | 87               | 34                 |
| 21 | <i>GRP94</i>    | F: 5'-TGACGATGAAGTTGATGTGGAT-3'<br>R: 5'-CATCATTCTGTAACTCCGGCTT-3' | XM_003832567.2<br>245-440 | 60     | 196              | 34                 |
| 22 | <i>MDR-1</i>    | F: 5'-ACACCTGGGCATCGT-3'<br>R: 5'-TATTAGGCAGTGACTCGA-3'            | NM_000927<br>3826-3983    | 60     | 158              | 34                 |
| 23 | <i>GRP78</i>    | F: 5'-GTTCTTGCCGTTCAAGGTGG-3'<br>R: 5'-TGGTACAGTAACAACCTGCATG-3'   | FJ436356<br>600-780       | 60     | 181              | 34                 |
| 24 | <i>CD147</i>    | F: 5'-TACTCCTGCGTCTTCTCC-3'<br>R: 5'-TGCGAGGAACTCACGAAG-3'         | KJ896510.1<br>318-556     | 60     | 239              | 34                 |
| 25 | <i>FBXW7</i>    | F: 5'-AGATGGACCAGGAGAGTG-3'<br>R: 5'-CTTGCATGGTTTCTTTCC-3'         | XM_009448414.1<br>554-771 | 60     | 218              | 34                 |
| 26 | <i>TOP1</i>     | F: 5'-AAAGATCGAGAACACCGG-3'<br>R: 5'-TGTTTGGTCTTCTCCTTCT-3'        | XM_004062154.1<br>335-456 | 60     | 122              | 34                 |

|    |                            |                                                                         |                           |    |     |    |
|----|----------------------------|-------------------------------------------------------------------------|---------------------------|----|-----|----|
| 27 | <i>TOP2</i>                | F: 5'-AAAATGAAGATGCTAAGAAAAGACT-3'<br>R:5'-GTACAAACCAGGAACAAAAGTGACT-3' | XM_003315476.2<br>226-413 | 60 | 188 | 34 |
| 28 | <i>MLH1</i>                | F: 5'-TGCAAAATCCACAAGTATTCA-3'<br>R:5'-TGTATGCACACTTCCATCAG-3'          | XM_009445169.1<br>211-467 | 60 | 257 | 34 |
| 29 | <i>MRP1</i>                | F: 5'-TTTCAGAACACGGTCCTCG-3'<br>R:5'-TGGGCTGACCAGAAACACT-3'             | XM_009430367.1<br>118-351 | 60 | 234 | 34 |
| 30 | <i>BCRP</i>                | F: 5'-GACAGCTTCCAATGACCTGAA-3'<br>R: 5'-CAGGATGGCGTTGAGACC-3'           | XM_005263356<br>285-456   | 60 | 172 | 34 |
| 31 | <i>GST<math>\pi</math></i> | F: 5'-CGGGCAAGGATGACTATGTGA -3'<br>R: 5'-GGGCTAGGACCTCATGGATCA -3'      | XM_001152516<br>585-746   | 60 | 162 | 34 |
| 32 | <i>GAPDH</i>               | F: 5'-CAATGACCCCTTCATTGACC-3'<br>R: 5'-TGGAAGATGGTGATGGGATT-3'          | NM_002046.3<br>201-335    | 60 | 135 | 34 |

**Supplementary Table 2** The primary antibodies used in Western blot.

|    | <b>Antibody</b>                | <b>Species</b> | <b>Dilution</b> | <b>Company</b> | <b>Code number</b> |
|----|--------------------------------|----------------|-----------------|----------------|--------------------|
| 1  | ING5                           | rabbit         | 1:1000          | proteintech    | 10665-1-AP         |
| 2  | p21 (F-5)                      | mouse          | 1:500           | santa cruz     | sc-6246            |
| 3  | Cyclin E1(C-19)                | rabbit         | 1:500           | santa cruz     | sc-198             |
| 4  | Cyclin D1(H-295)               | rabbit         | 1:500           | santa cruz     | sc-753             |
| 5  | Cdk4 (C-22)                    | rabbit         | 1:500           | santa cruz     | sc-260             |
| 6  | Cyclin B1 (GNS1)               | mouse          | 1:500           | santa cruz     | sc-245             |
| 7  | Cdc2 p34 (B-6)                 | mouse          | 1:500           | santa cruz     | sc-8395            |
| 8  | p-Cdc2 p34 (Tyr 15)            | rabbit         | 1:500           | santa cruz     | sc-7989            |
| 9  | c-Jun (H-79)                   | rabbit         | 1:500           | santa cruz     | sc-1694            |
| 10 | Cdc25B (H-85)                  | rabbit         | 1:500           | santa cruz     | sc-5619            |
| 11 | Cdc25C (H-6)                   | mouse          | 1:500           | santa cruz     | sc-13138           |
| 12 | Bcl-2 (C 21)                   | rabbit         | 1:500           | santa cruz     | sc-783             |
| 13 | Bax (B-9)                      | mouse          | 1:500           | santa cruz     | sc-7480            |
| 14 | AIF (E-1)                      | mouse          | 1:700           | santa cruz     | sc-13116           |
| 15 | XIAP (H-202)                   | rabbit         | 1:500           | santa cruz     | sc-11426           |
| 16 | 14-3-3 (H-8)                   | mouse          | 1:500           | santa cruz     | sc-1657            |
| 17 | c-myc (9E10)                   | mouse          | 1:500           | santa cruz     | sc-40              |
| 18 | Beclin 1                       | rabbit         | 1:2000          | abcam          | Ab51031            |
| 19 | ATG7(N-20)                     | goat           | 1:500           | santa cruz     | sc-8668            |
| 20 | ATG14                          | rabbit         | 1:1000          | cell signaling | #5504              |
| 21 | Akt1/2/3 (H-136)               | rabbit         | 1:500           | santa cruz     | sc-8312            |
| 22 | p-Akt1/2/3 (Ser473)            | rabbit         | 1:500           | santa cruz     | sc-101629          |
| 23 | PI3-Kinase p100 (D-4)          | mouse          | 1:500           | santa cruz     | sc-8010            |
| 24 | p70 S6 kinase $\beta$ (N-19)   | goat           | 1:500           | santa cruz     | sc-9379            |
| 25 | PKC $\zeta$ (C-20)             | rabbit         | 1:500           | santa cruz     | sc-216             |
| 26 | PKC $\delta$ (C-17)            | rabbit         | 1:500           | santa cruz     | sc-213             |
| 27 | MMP-9 (H-129)                  | rabbit         | 1:500           | santa cruz     | sc-10737           |
| 28 | p38 $\alpha$ / $\beta$ (H-147) | rabbit         | 1:500           | santa cruz     | sc-7149            |
| 29 | Sp1(PEP2)                      | rabbit         | 1:500           | santa cruz     | sc-59              |
| 30 | SIRT1(H-300)                   | rabbit         | 1:500           | santa cruz     | sc-15404           |
| 31 | p-Stat5a/b (Tyr 694)           | rabbit         | 1:500           | santa cruz     | sc-101806          |
| 32 | Ac-Histone H3 (Lys 9/14)       | rabbit         | 1:1000          | santa cruz     | sc-8655-R          |
| 33 | Ac-Histone H4 (Lys 8)          | rabbit         | 1:1000          | santa cruz     | sc-8660-R          |
| 34 | $\beta$ -catenin (C-18)        | goat           | 1:500           | santa cruz     | sc-1496            |
| 35 | NF- $\kappa$ B p65(A)          | rabbit         | 1:500           | santa cruz     | sc-109             |
| 36 | $\beta$ -actin(C4)             | mouse          | 1:2000          | santa cruz     | sc-47778           |
